# Supplementary material for: Effects of organic acids and initial solution pH on photocatalytic degradation of bisphenol A (BPA) in a photo-Fenton-like process using goethite (α-FeOOH)
Source: Royal Society of Chemistry journal article supplement (doi:10.1039/c6pp00051g), 2016-07-11
Supplement: c6pp00051g1.pdf [file c6pp00051g1.pdf]

*Supporting information for*

Effects of organic acids and initial solution pH on photocatalytic  
degradation of bisphenol A (BPA) in a photo-fenton-like process  
using Goethite ( $\alpha$ -FeOOH)

Guangshan Zhang,<sup>a</sup> Qiao Wang,<sup>a</sup> Wen Zhang,<sup>b</sup> Tian Li,<sup>a</sup> Yixing Yuan<sup>a</sup> and Peng Wang<sup>\*a</sup>

<sup>a</sup>*State Key Laboratory of Urban Water Resource and Environment, School of Municipal and Environmental Engineering, Harbin Institute of Technology, Harbin 150090, PR China*

<sup>b</sup>*John A. Reif, Jr. Department of Civil & Environmental Engineering, New Jersey Institute of Technology, Newark, NJ 07102, USA*

\*Corresponding author, Tel./fax: +86 451 86283557, E-mail address: [pwang73@vip.sina.com](mailto:pwang73@vip.sina.com)

This supporting information (SI) contains two figures (S1-S2).

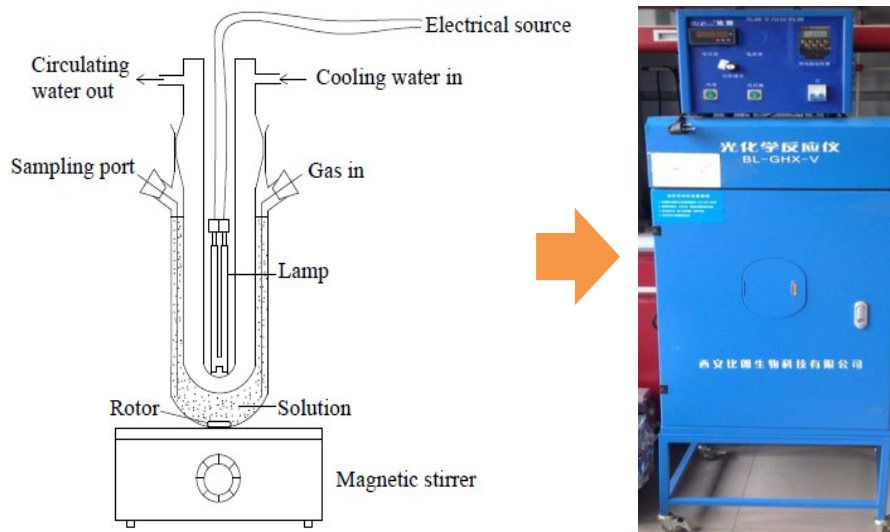

**Fig. S1** Schematics of the photoreactor.

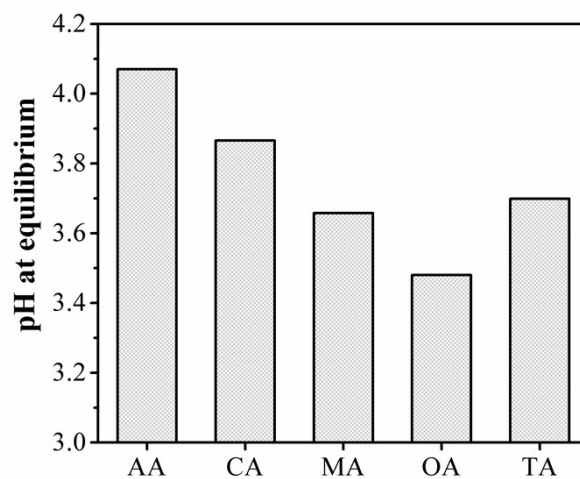

**Fig. S2** Potential pH drop after addition of organic acids at  $30 \text{ mg L}^{-1}$  into water with consideration of primary dissociation only. Results were calculated by MineQL.
